# Supplementary material
Source: publisher figshare collection journal article supplement (https://tandf.figshare.com/ndownloader/files/22221114)
Supplement: Supplementary file 1 [file 22221114]

# Appendix A


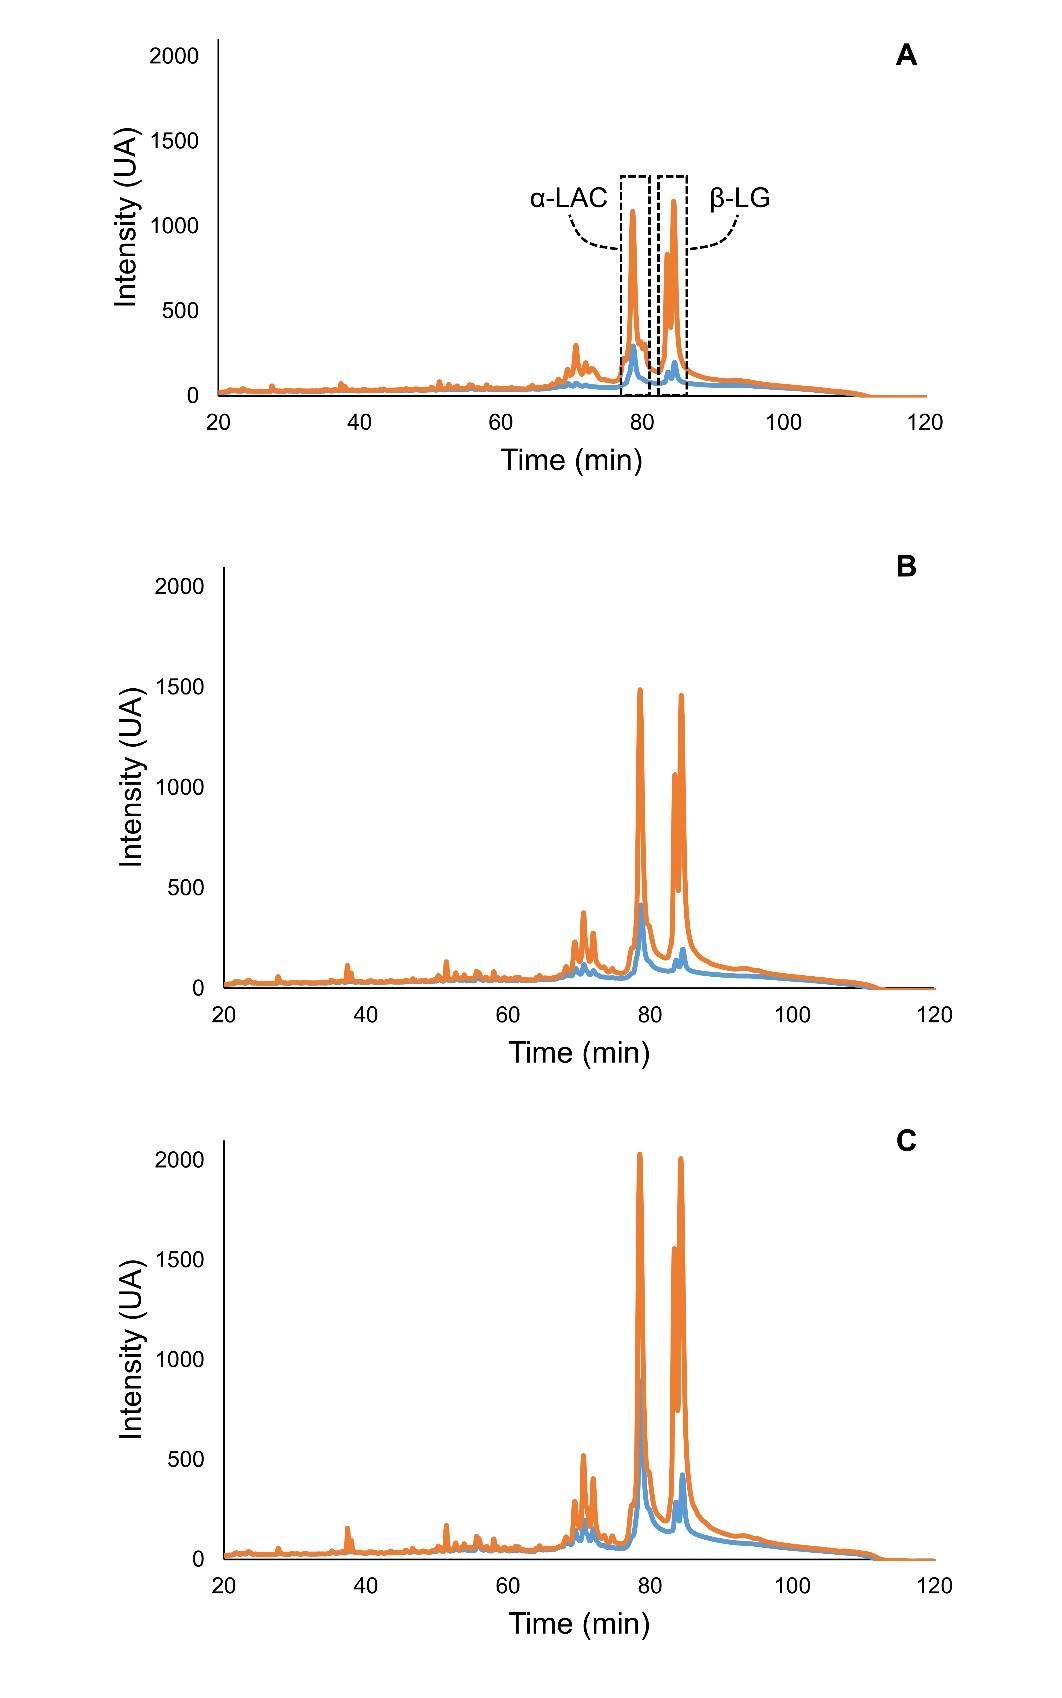


**Figure A.1.** Chromatogram of non-pressurized (red line) and pressurized milk (orange line) permeates at (A) 1.5×, (B) 3.0× and (C) 4.0×
